# Supplementary material
Source: PubMed Central journal article supplement (PMC5832055)

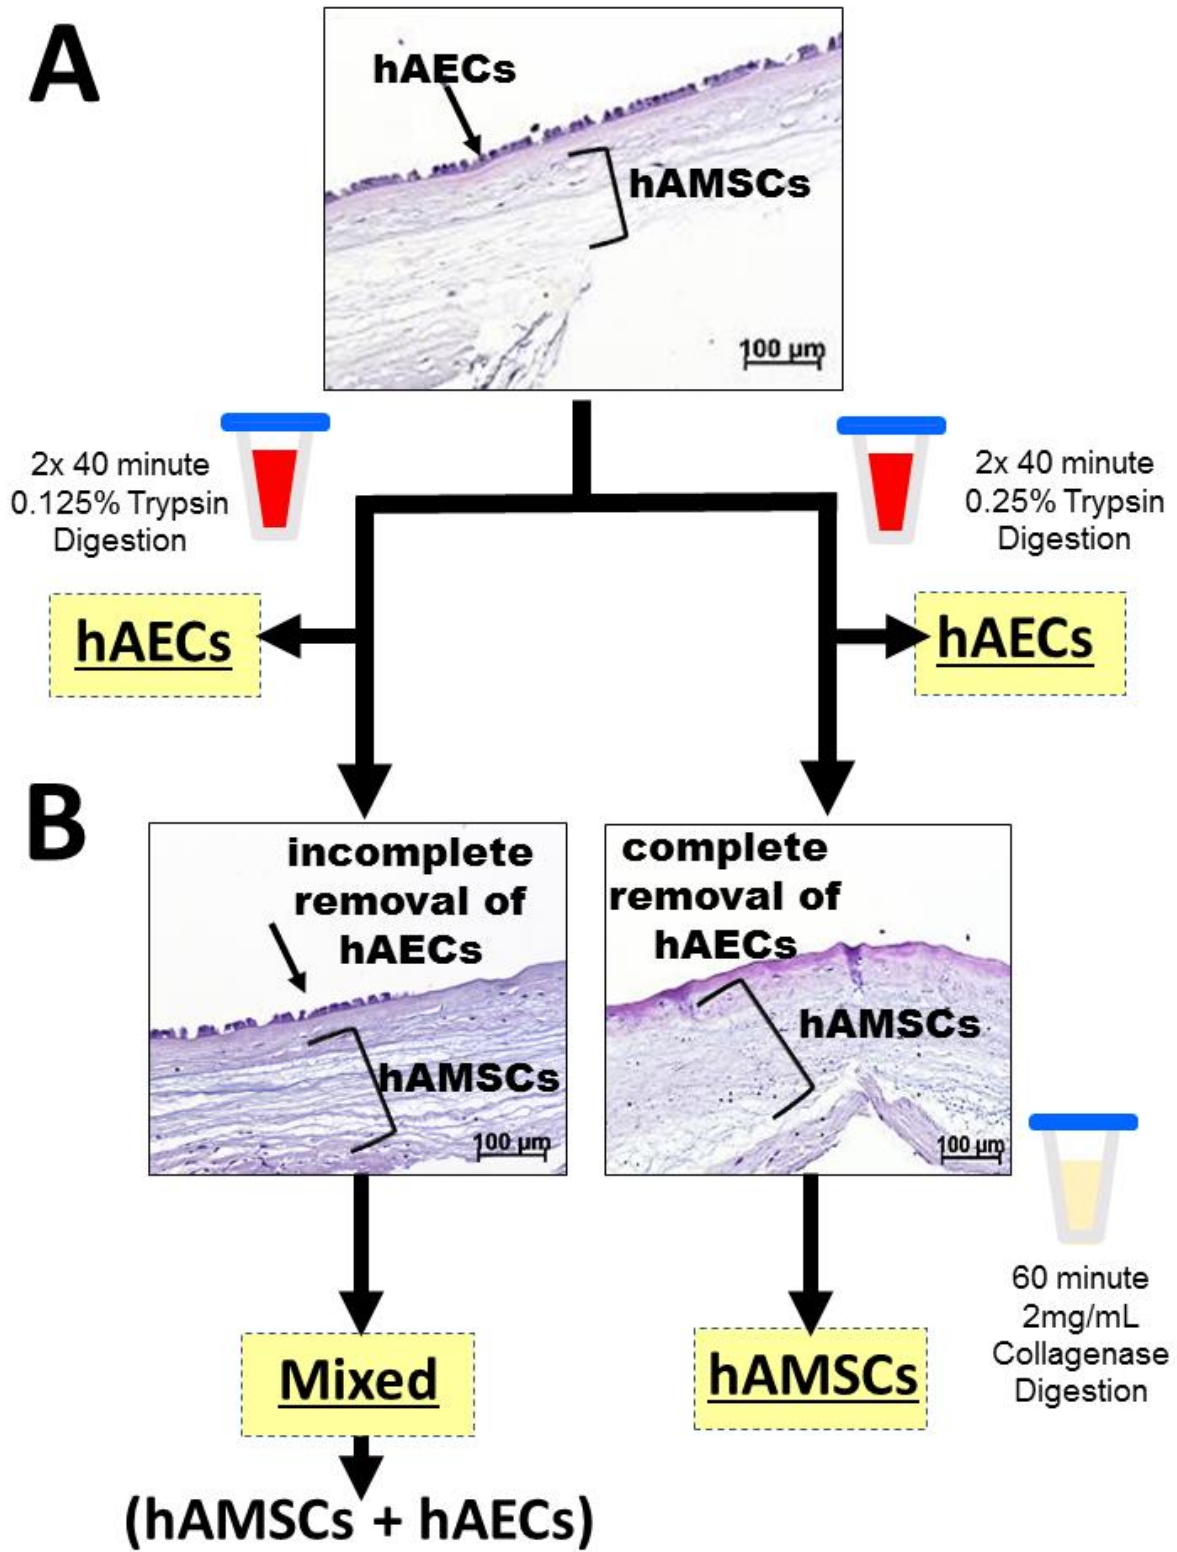

Appendix Figure A1.

Supplement: NIHMS944241-supplement-Appendix_A1.pdf [file NIHMS944241-supplement-Appendix_A1.pdf]
